# Supplementary material
Source: Springer Nature journal article supplement (https://www.springerprofessional.de/resource/supplementary/13638_2012_834_MOESM2_ESM.pdf/11898590)

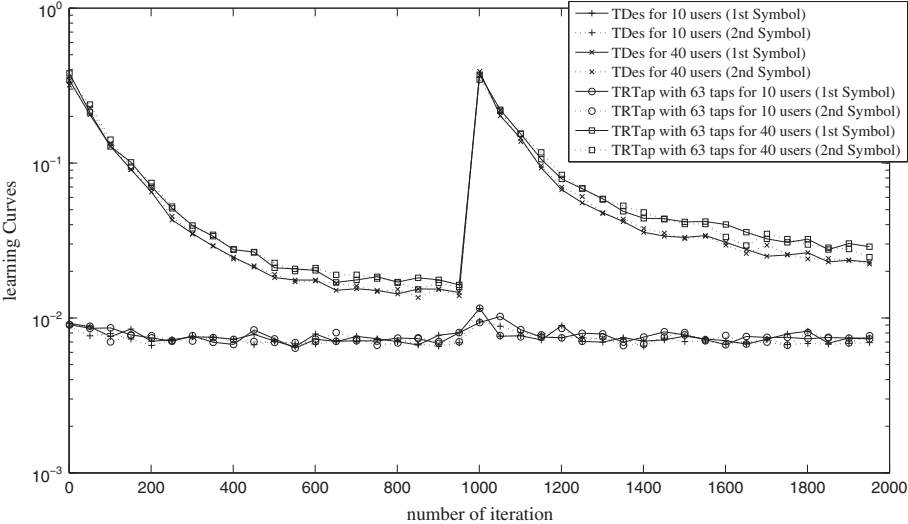

Supplement: MOESM2 [file 11898590]
